# Supplementary material for: Boosts for walking: how humorous messages increase brisk walking among cognitively fatigued individuals
Source: Springer Nature journal article supplement (doi:10.1186/s12889-023-17464-z), 2024-01-09

Supplementary Materials

Stimuli Materials: Humorous and Non-Humorous Intervention Messages

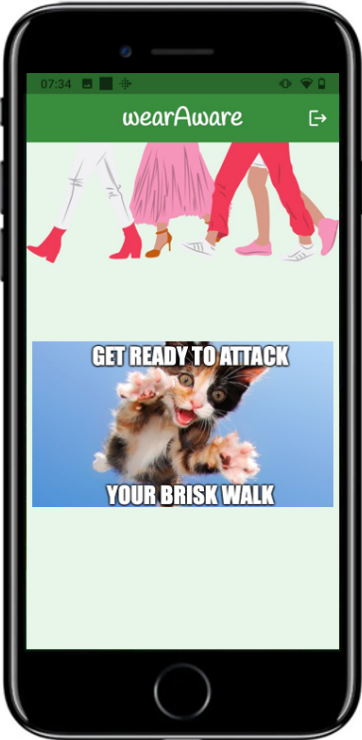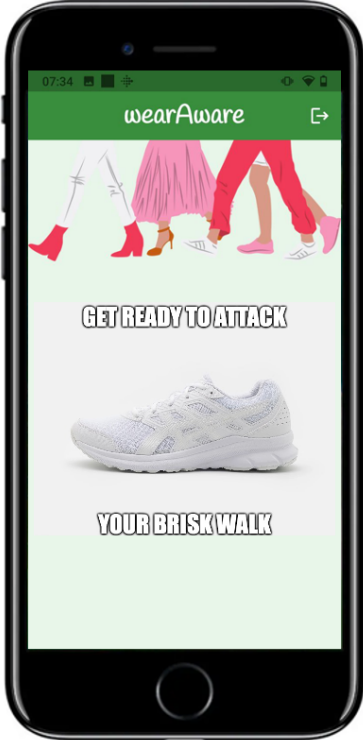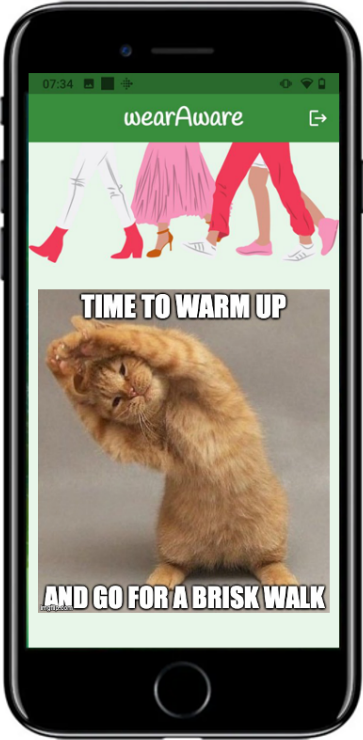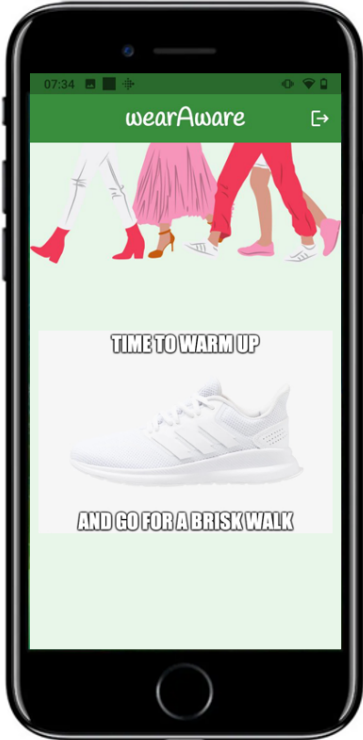

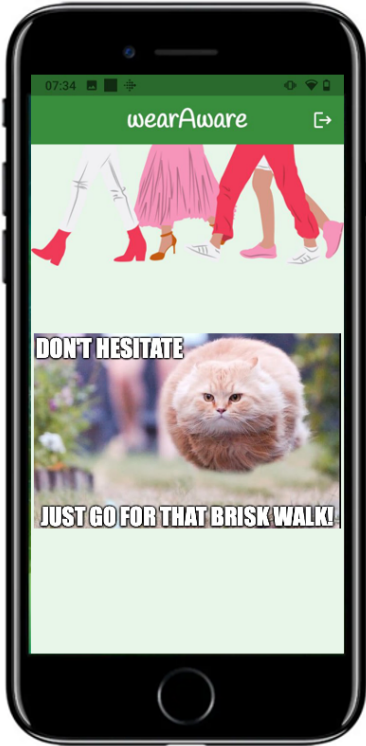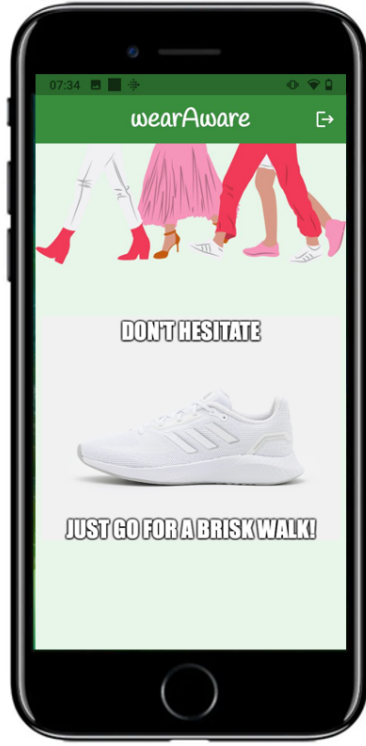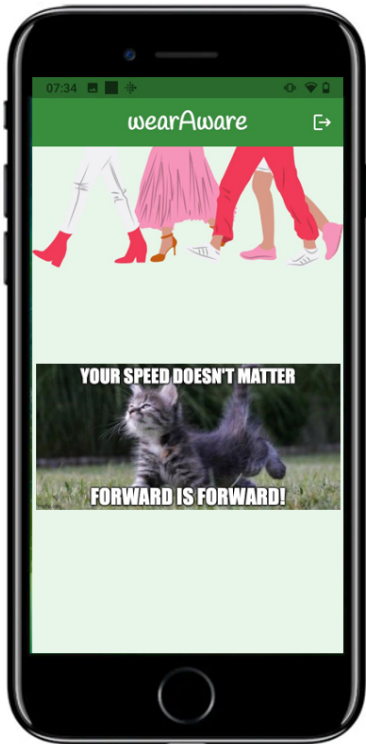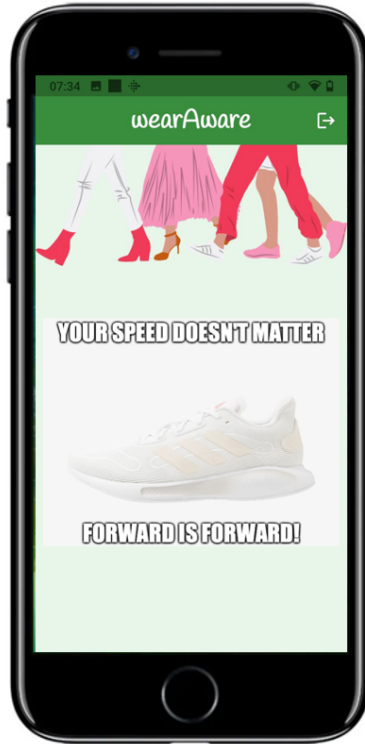

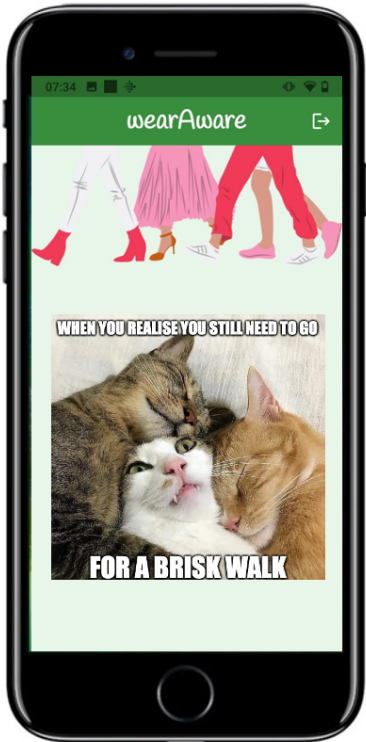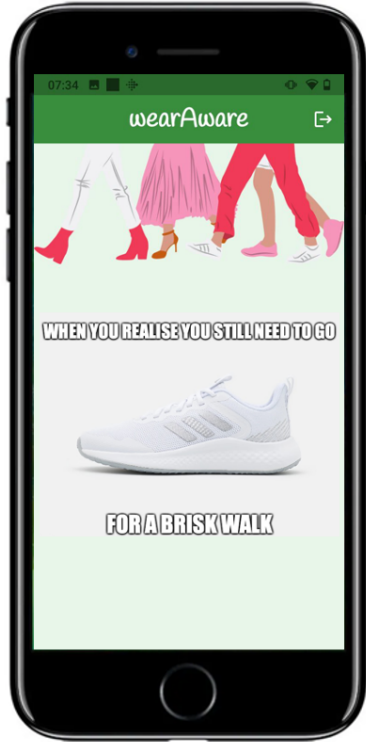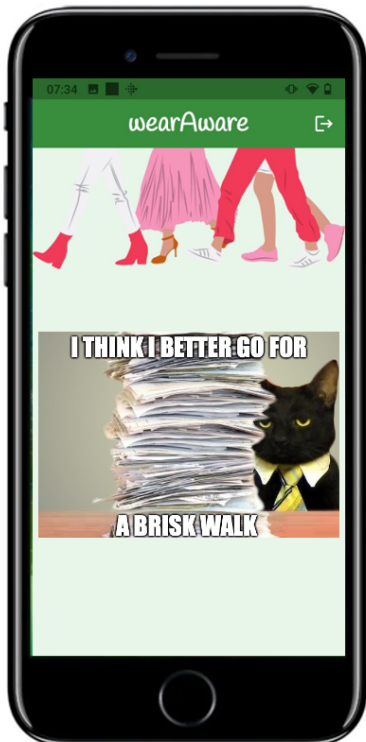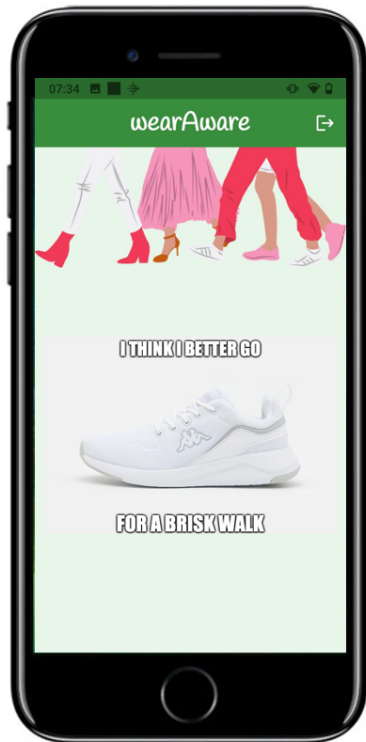

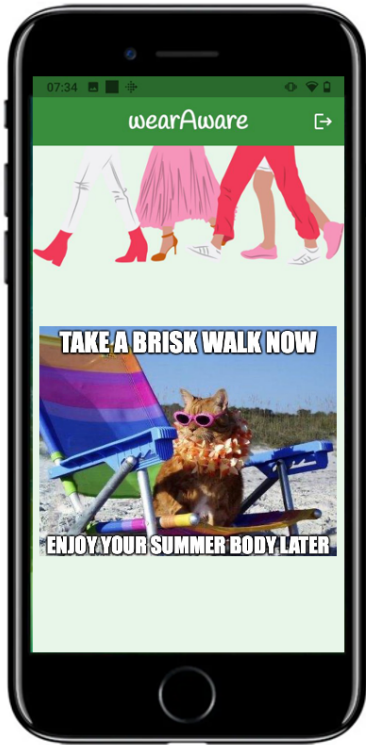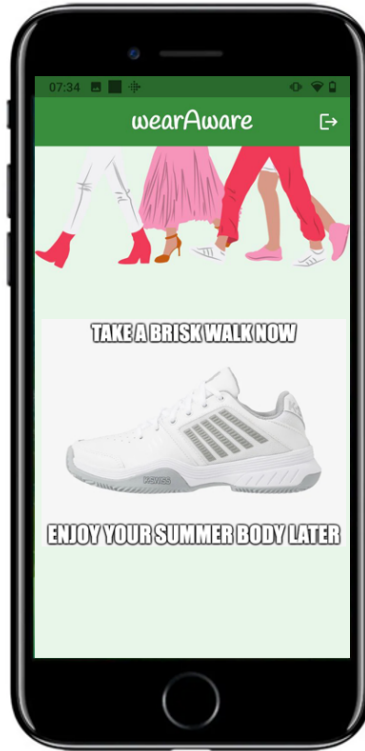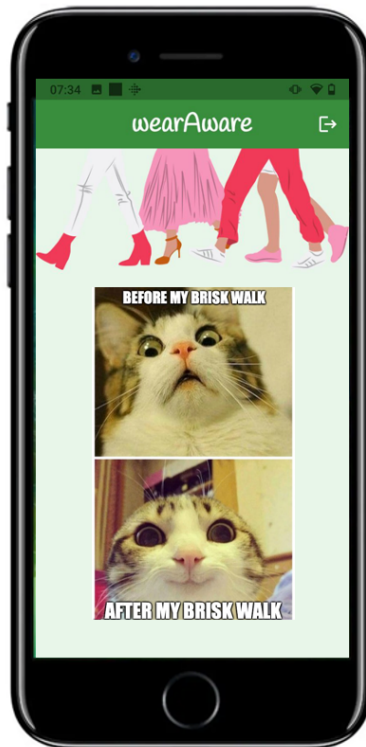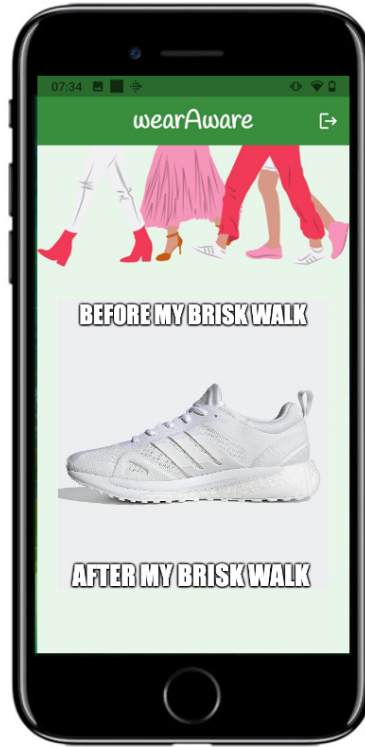

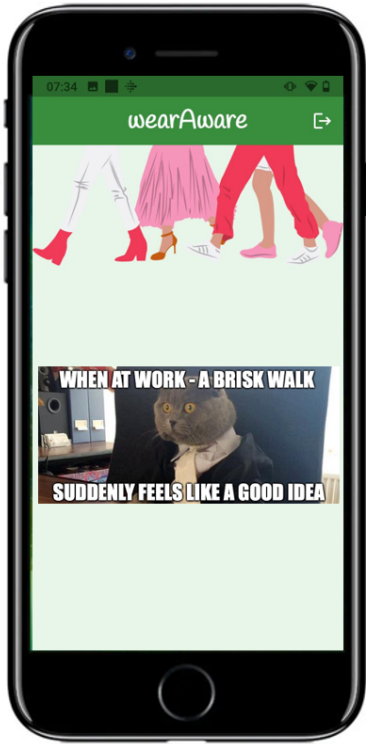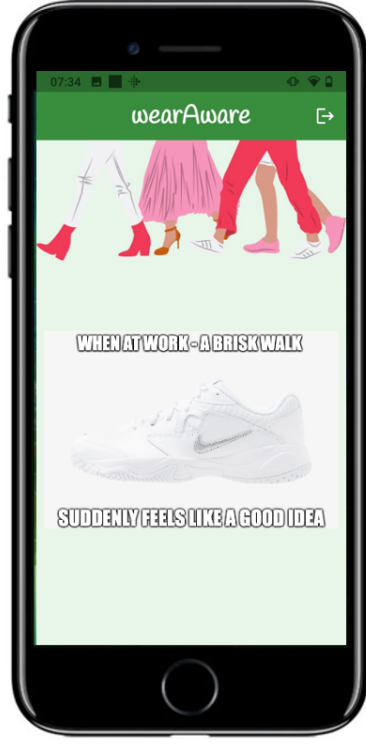

Supplement: MOESM1 [file 26610216]
